# Supplementary material for: Astringency Sensitivity to Tannic Acid: Effect of Ageing and Saliva
Source: MDPI journal article supplement (doi:10.3390/molecules27051617), 2022-02-28
Supplement: s1 [file s1]

**Table S1.** Description of the tasting solutions used for the training session.

| Taste               | Salty                                     | Bitter                            | Sweet                              | Umami                               | Sour                           | Astringent                             |
|---------------------|-------------------------------------------|-----------------------------------|------------------------------------|-------------------------------------|--------------------------------|----------------------------------------|
| Component           | Sodium chloride<br>(Sigma-Aldrich-France) | Leucine<br>(Dolder Rexim, France) | Sucrose<br>(Sigma-Aldrich, France) | Sodium glutamate<br>(Merck, France) | DL-Lactic acid (Fluka, France) | Tannic acid<br>(Sigma-Aldrich, France) |
| Concentration (g/L) | 3                                         | 8                                 | 15                                 | 0.6                                 | 2                              | 1.76                                   |
